# Supplementary material
Source: PubMed Central journal article supplement (PMC8932952)

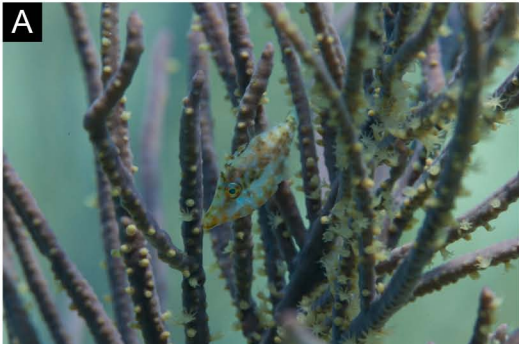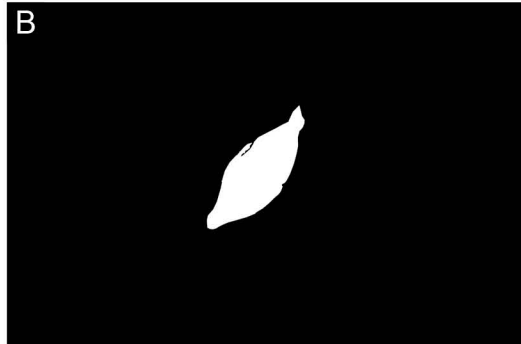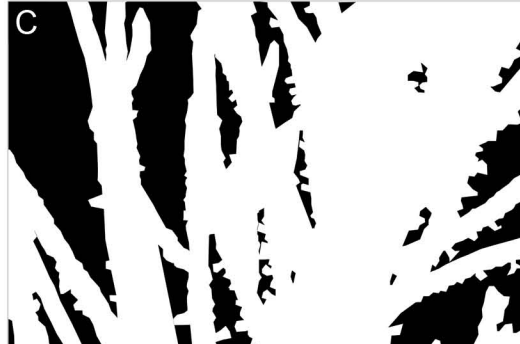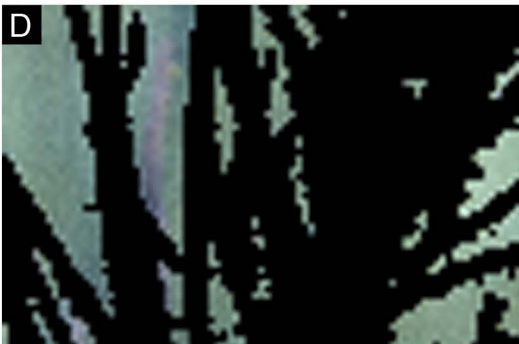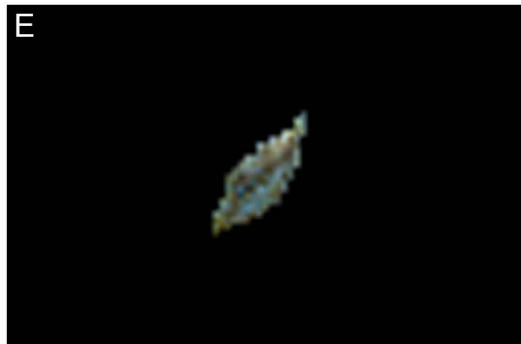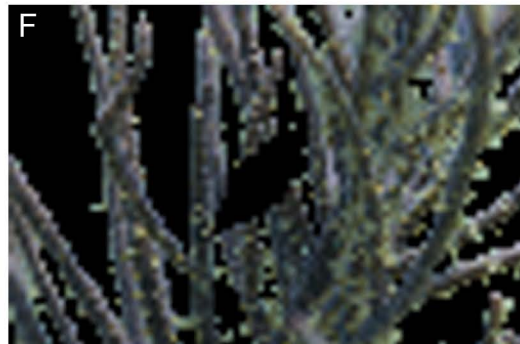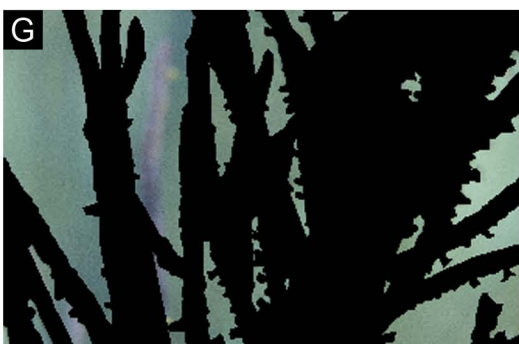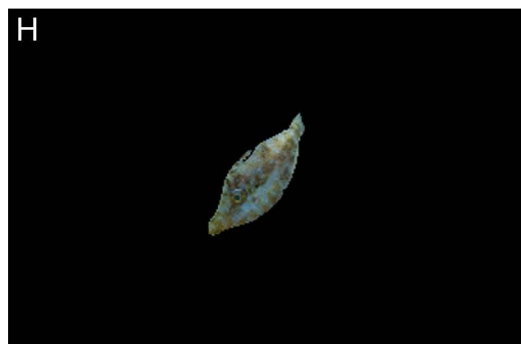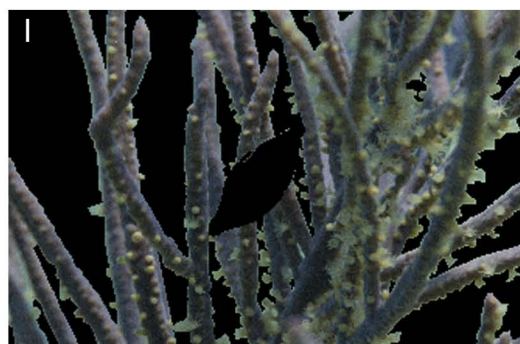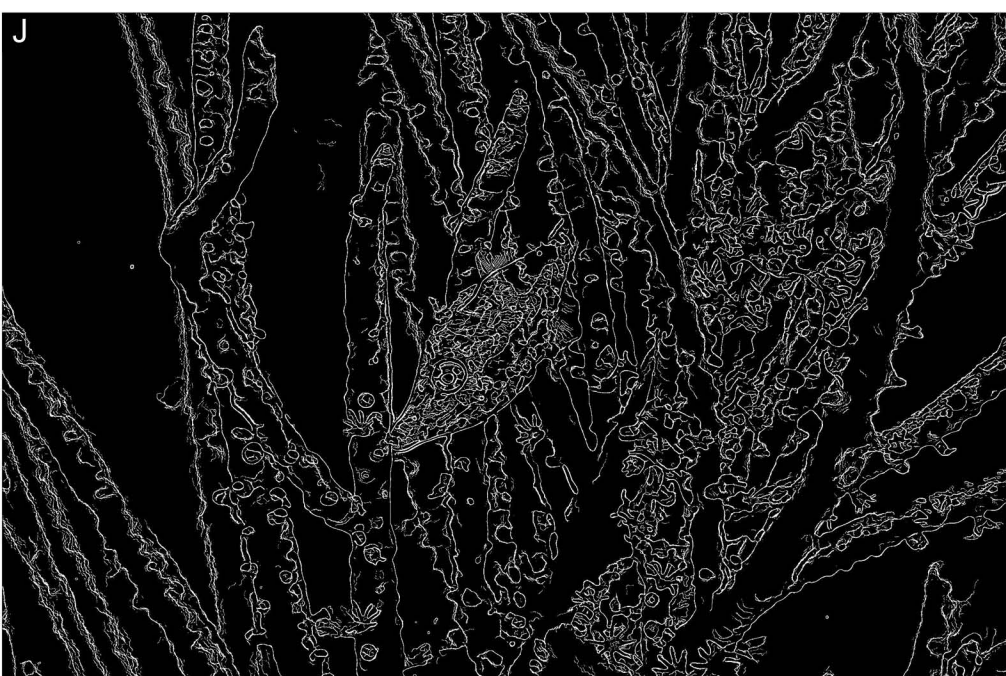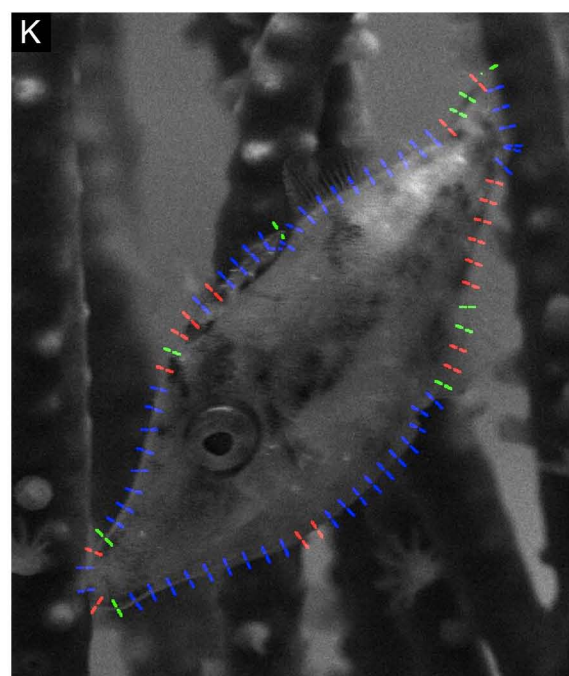

Supplement: NIHMS1732178-supplement-Allen_et_al__BJLS_2015_Supp__Fig__1.pdf [file NIHMS1732178-supplement-Allen_et_al__BJLS_2015_Supp__Fig__1.pdf]

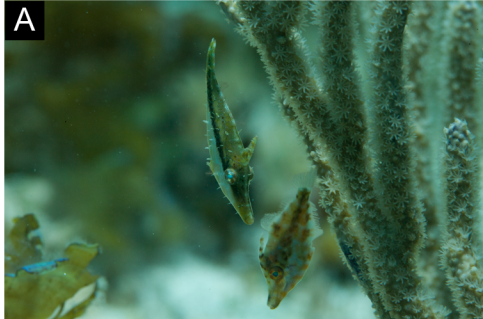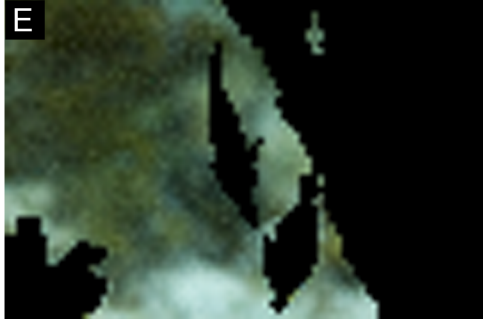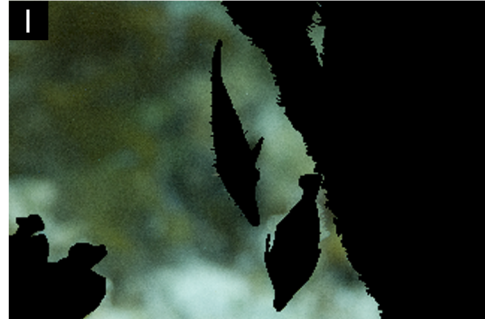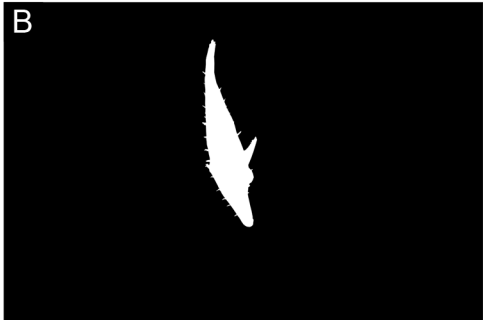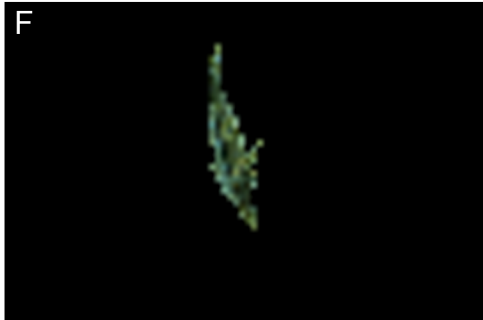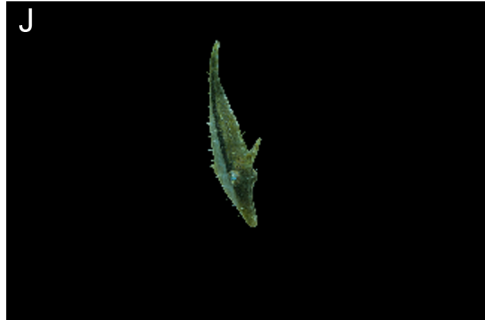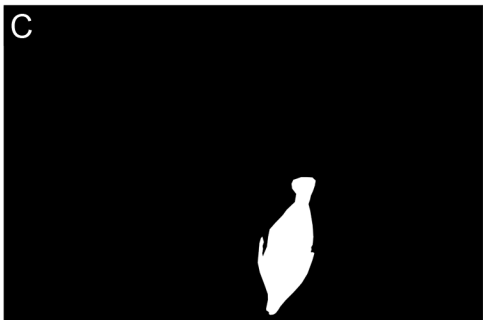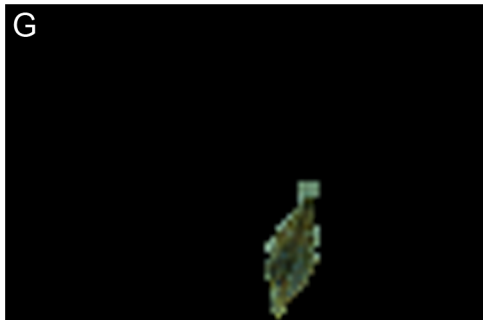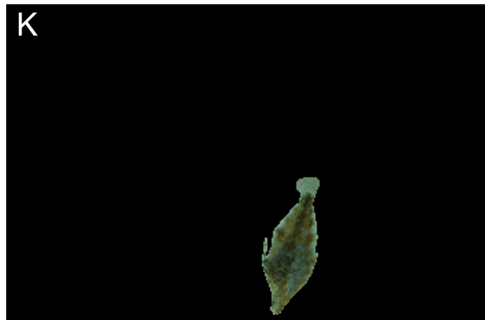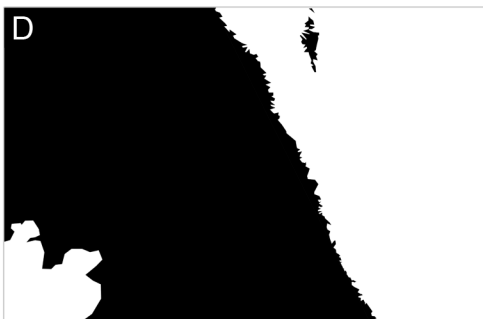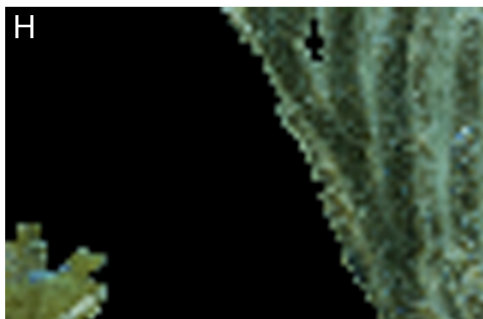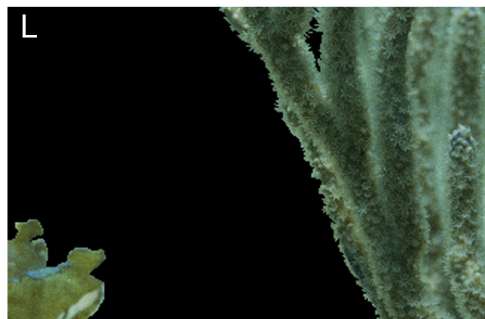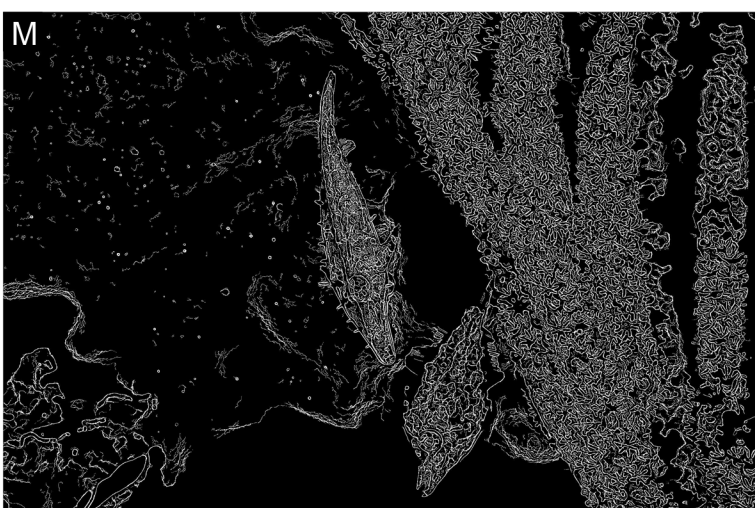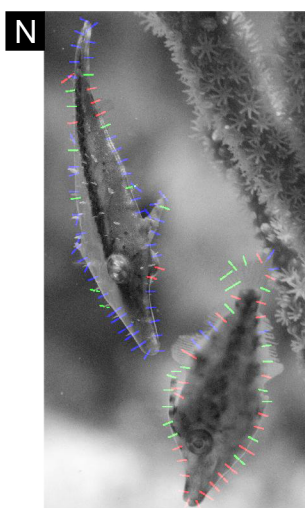

Supplement: NIHMS1732178-supplement-Allen_et_al__BJLS_2015_Supp__Fig__10.pdf [file NIHMS1732178-supplement-Allen_et_al__BJLS_2015_Supp__Fig__10.pdf]

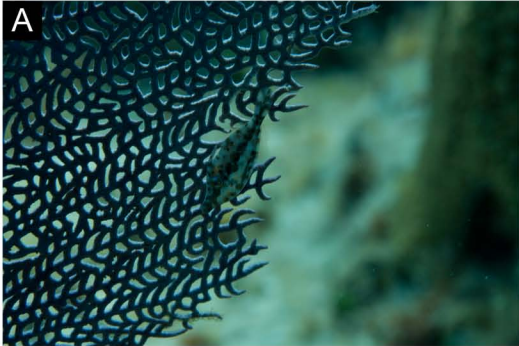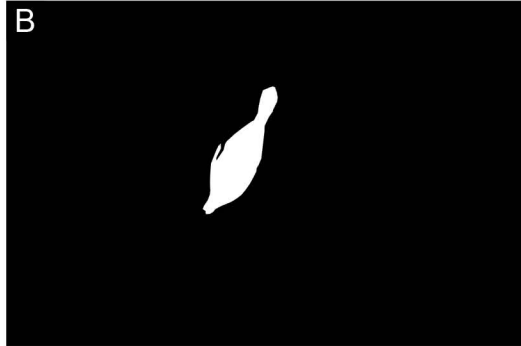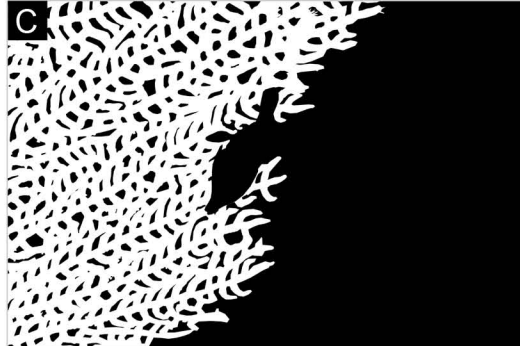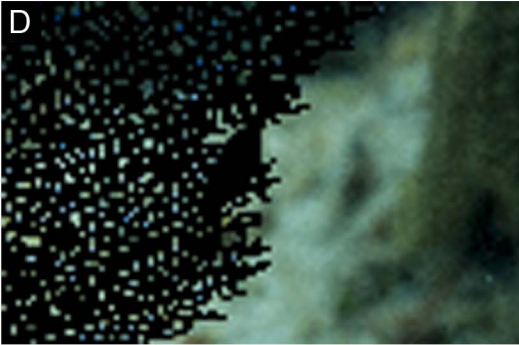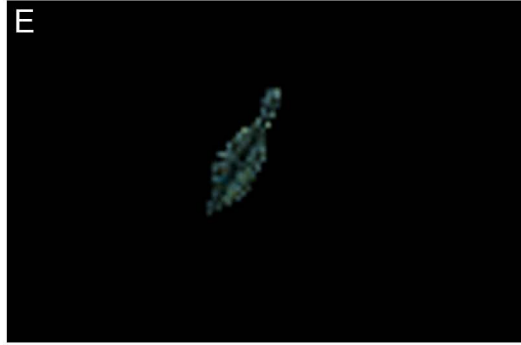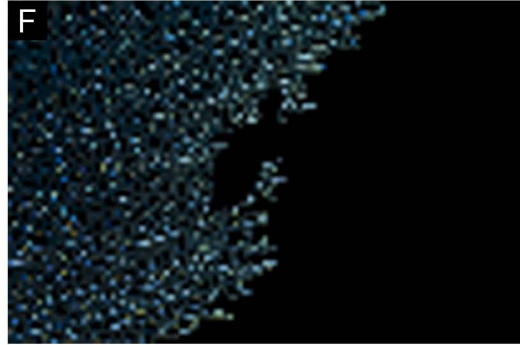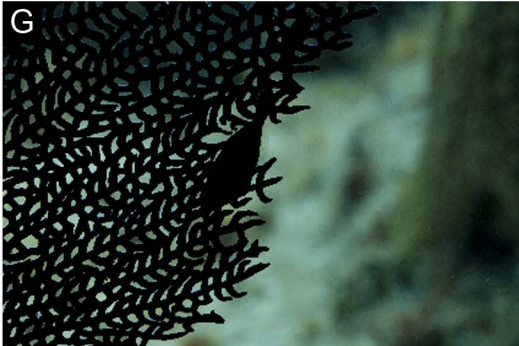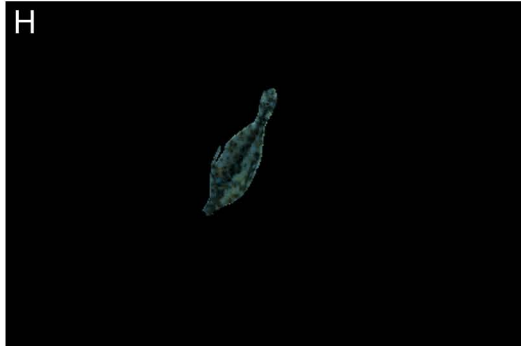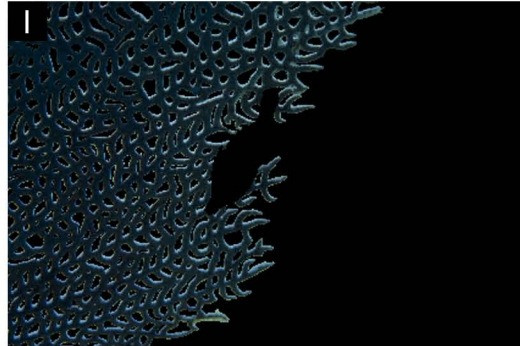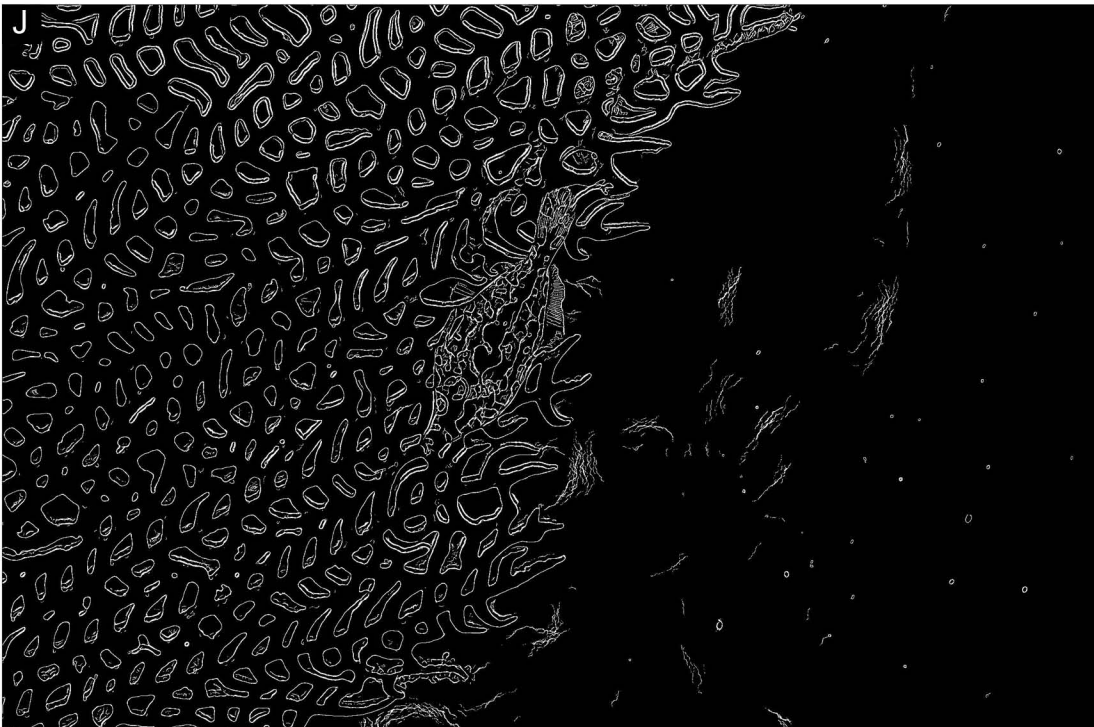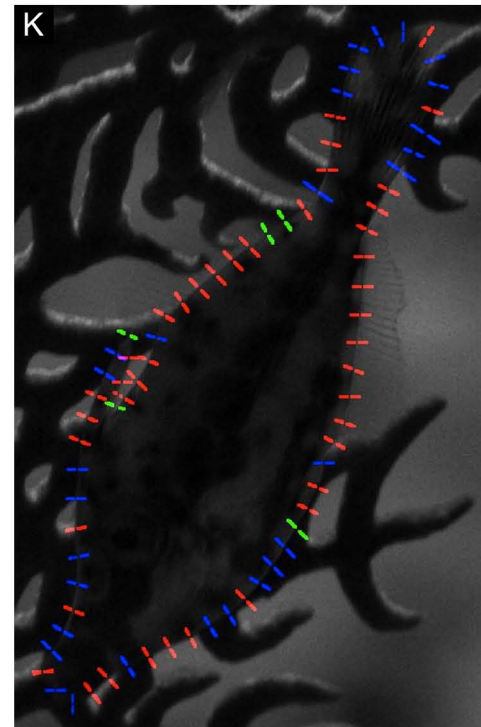

Supplement: NIHMS1732178-supplement-Allen_et_al__BJLS_2015_Supp__Fig__2.pdf [file NIHMS1732178-supplement-Allen_et_al__BJLS_2015_Supp__Fig__2.pdf]

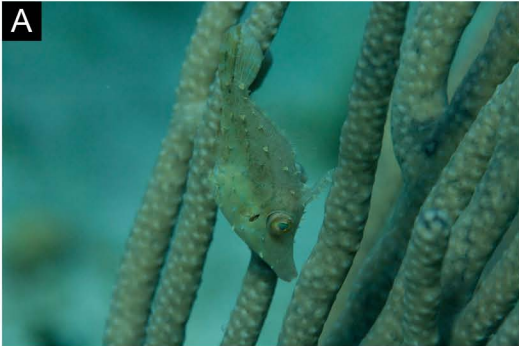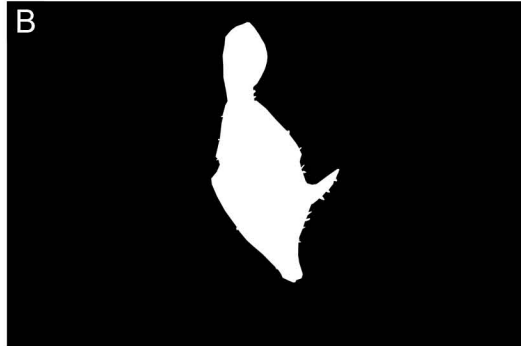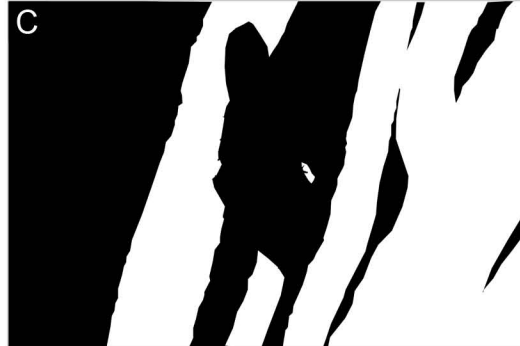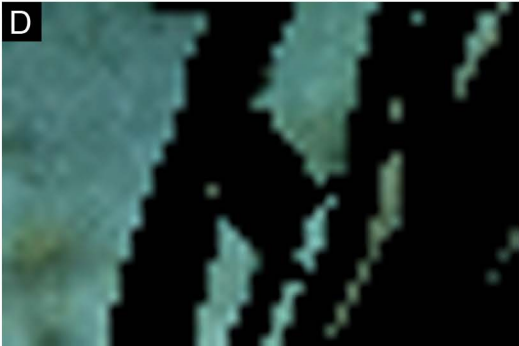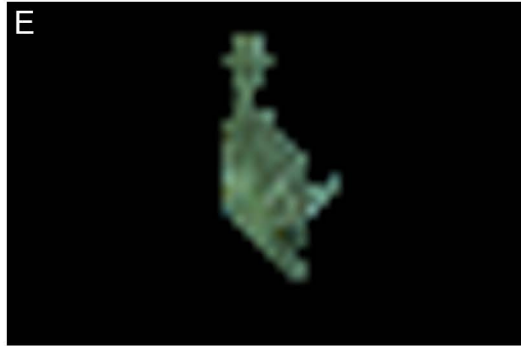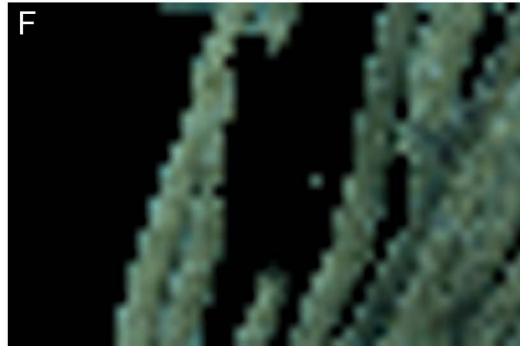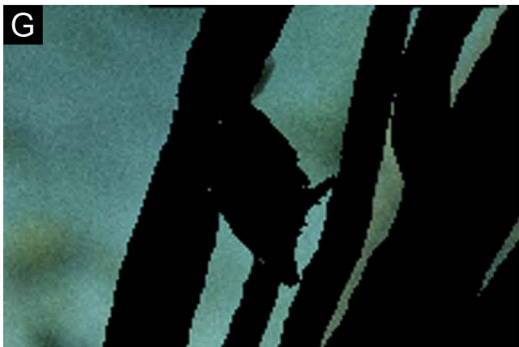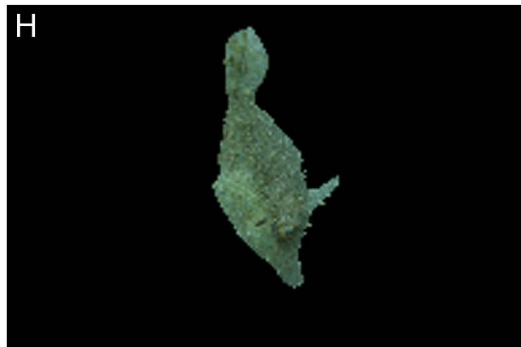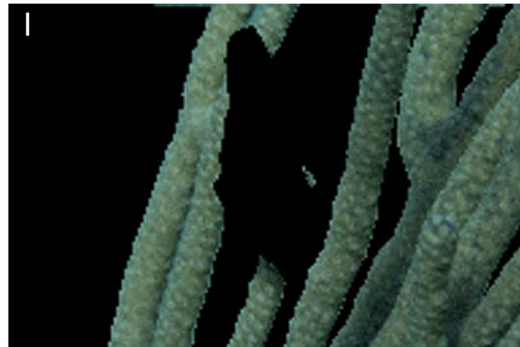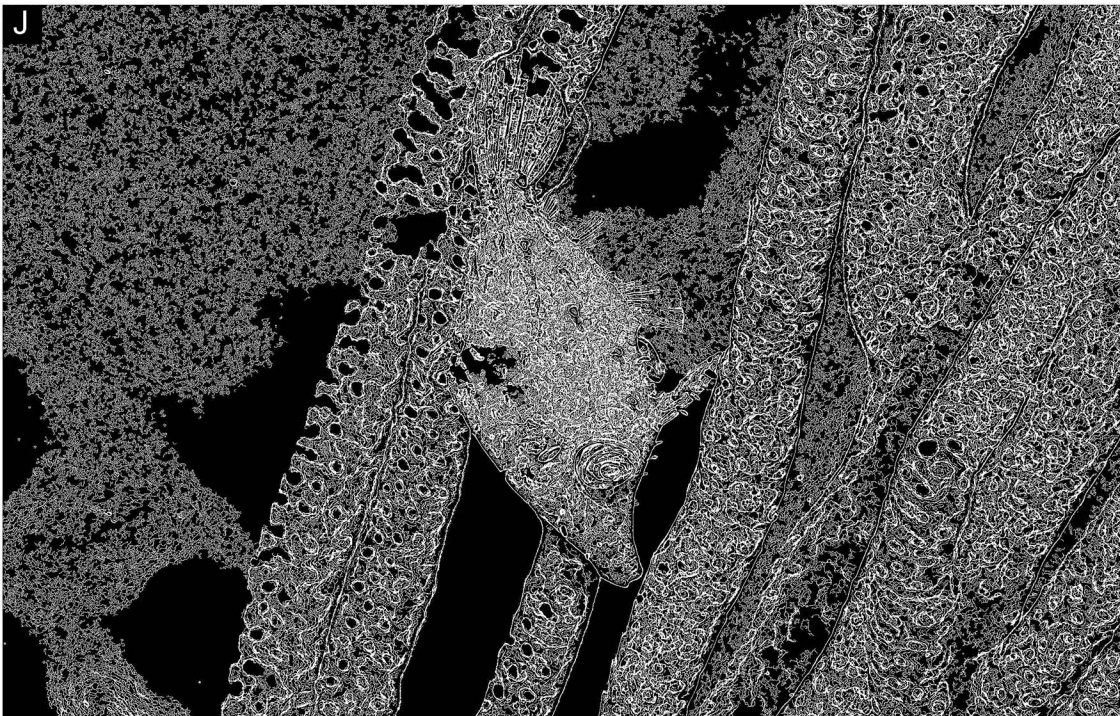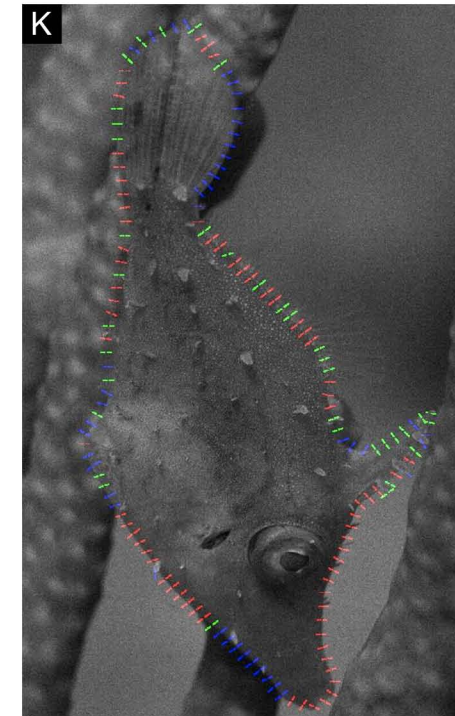

Supplement: NIHMS1732178-supplement-Allen_et_al__BJLS_2015_Supp__Fig__3.pdf [file NIHMS1732178-supplement-Allen_et_al__BJLS_2015_Supp__Fig__3.pdf]

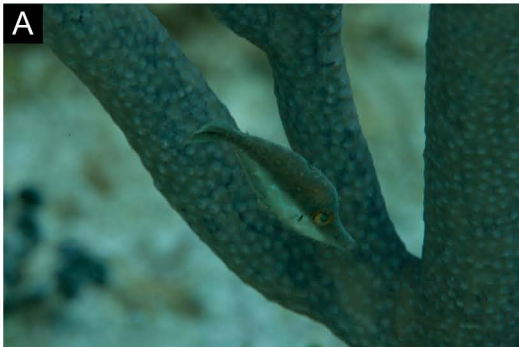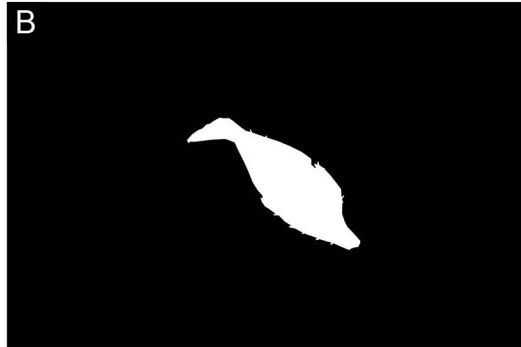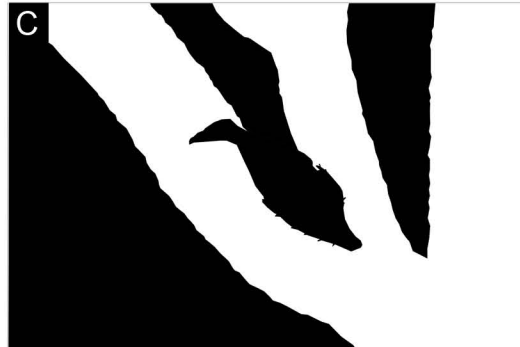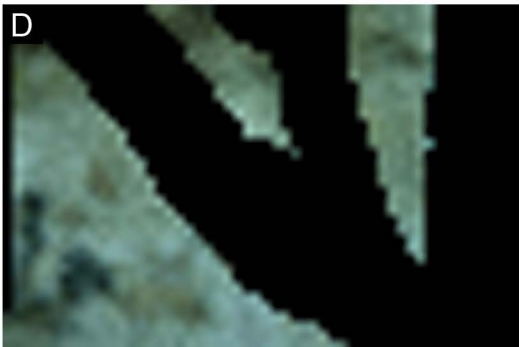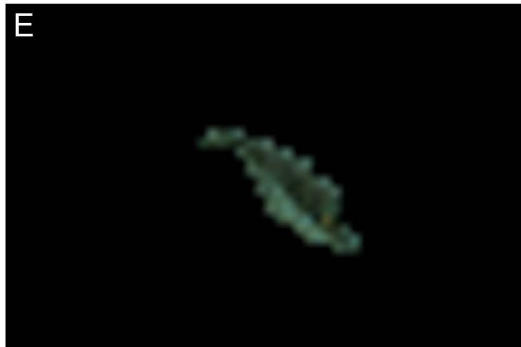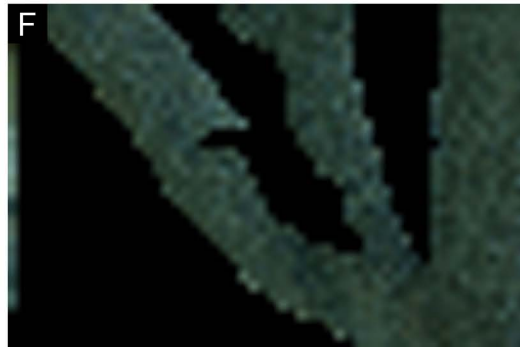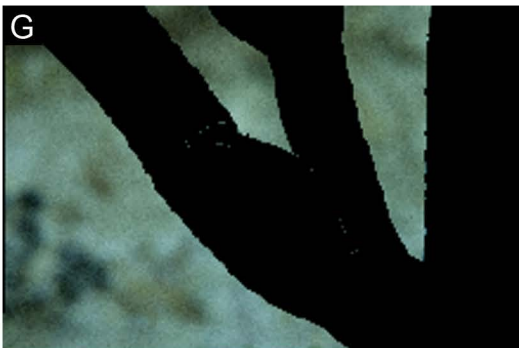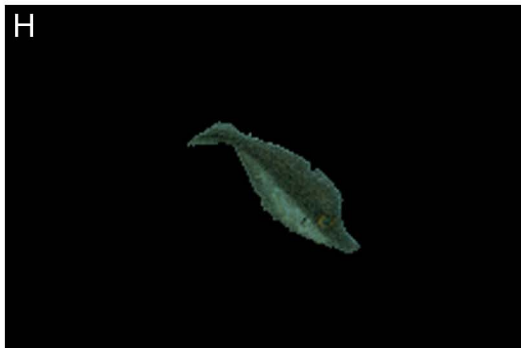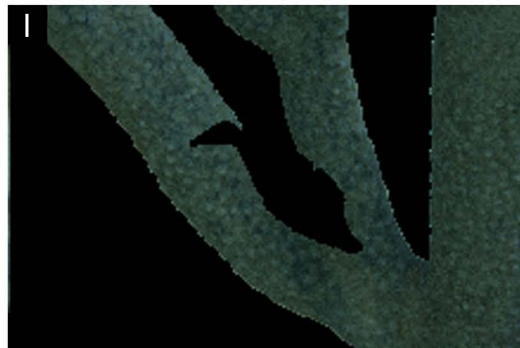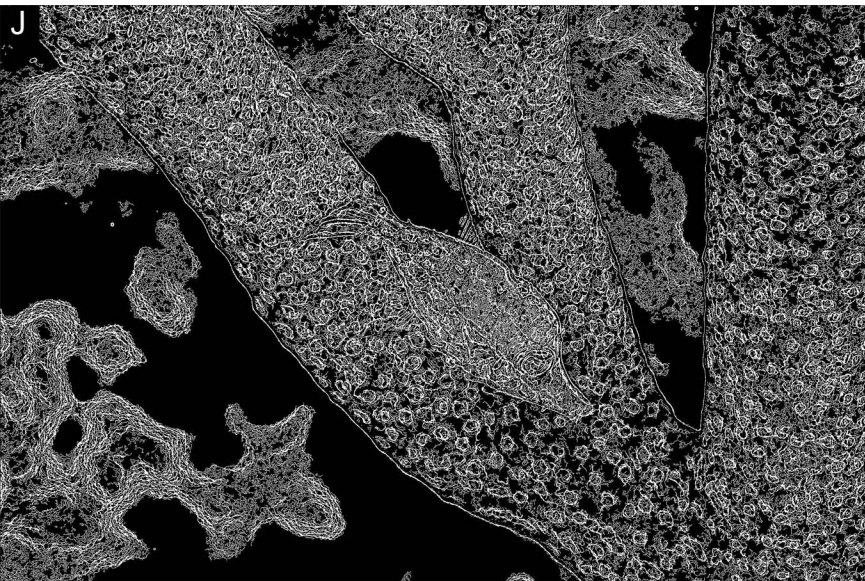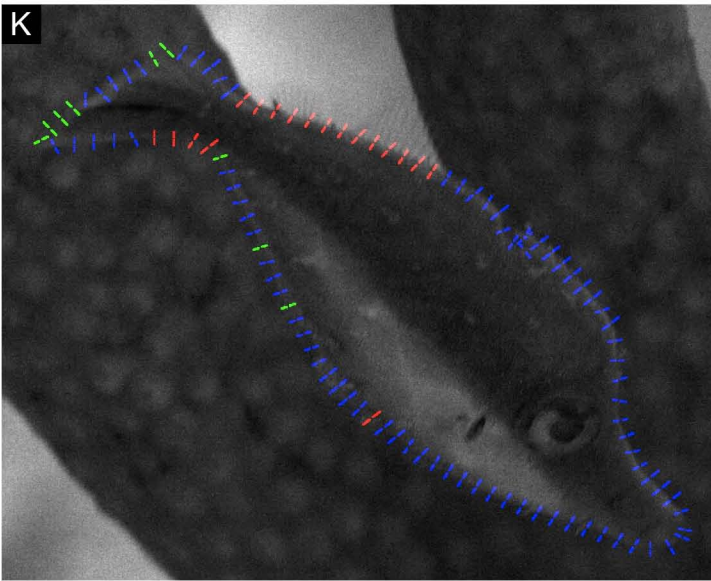

Supplement: NIHMS1732178-supplement-Allen_et_al__BJLS_2015_Supp__Fig__4.pdf [file NIHMS1732178-supplement-Allen_et_al__BJLS_2015_Supp__Fig__4.pdf]

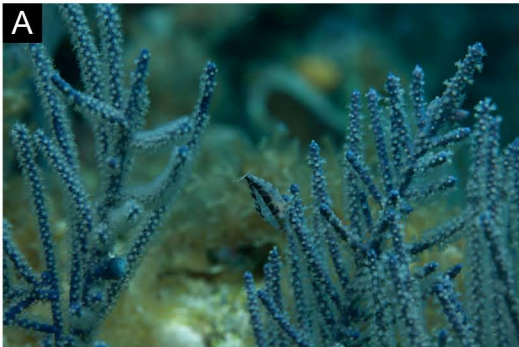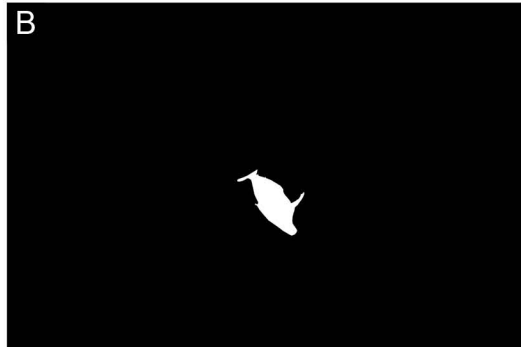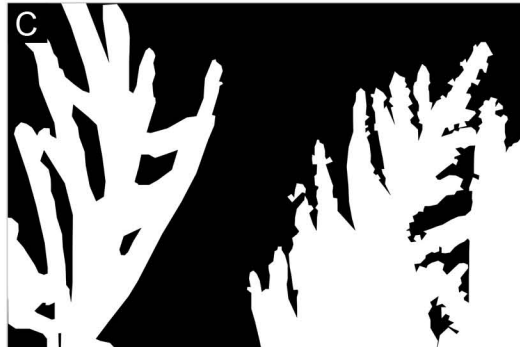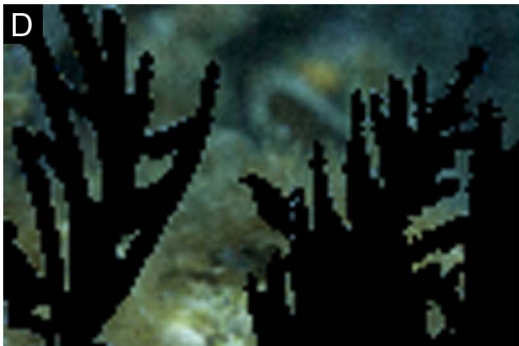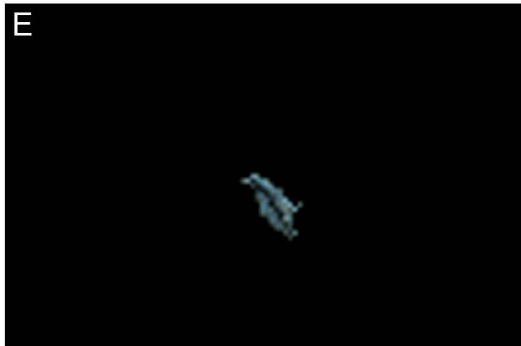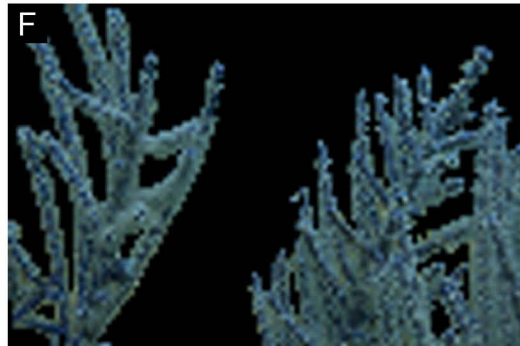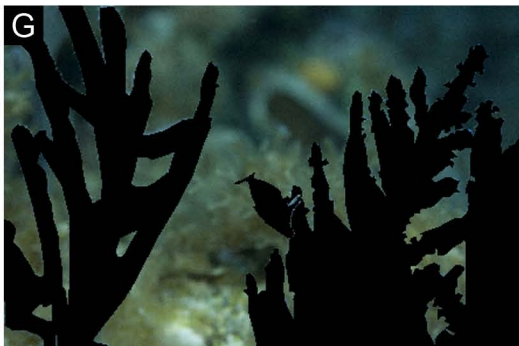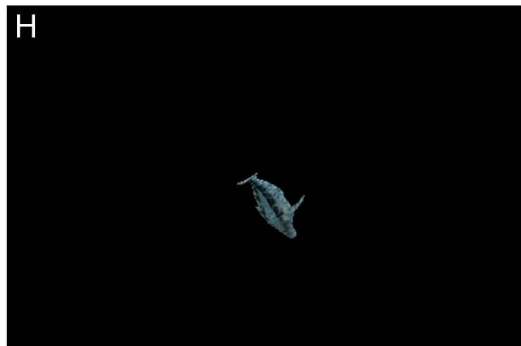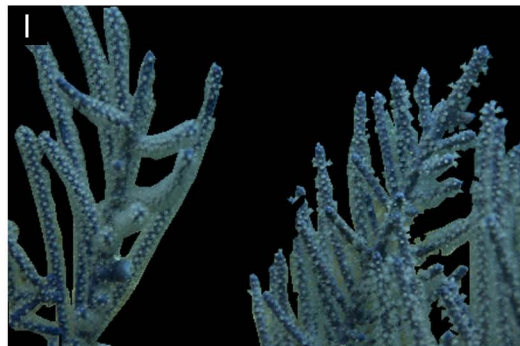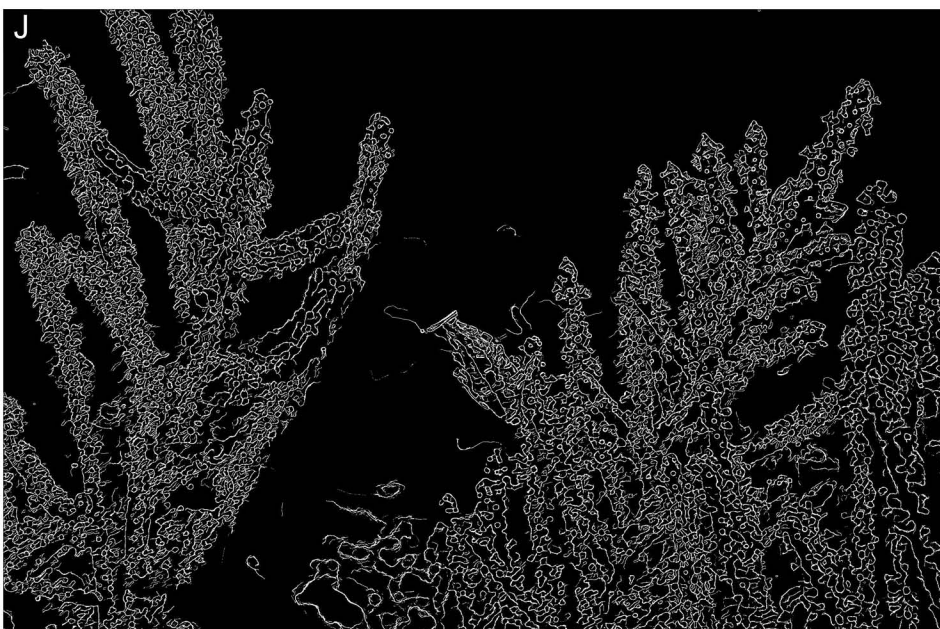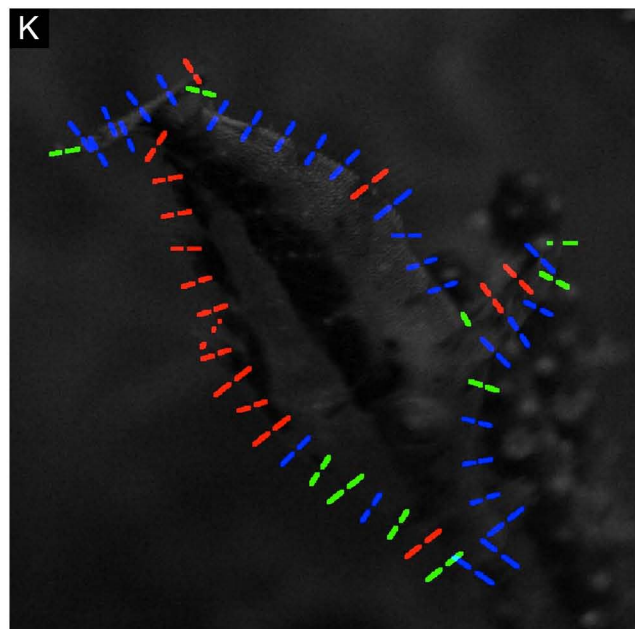

Supplement: NIHMS1732178-supplement-Allen_et_al__BJLS_2015_Supp__Fig__5.pdf [file NIHMS1732178-supplement-Allen_et_al__BJLS_2015_Supp__Fig__5.pdf]

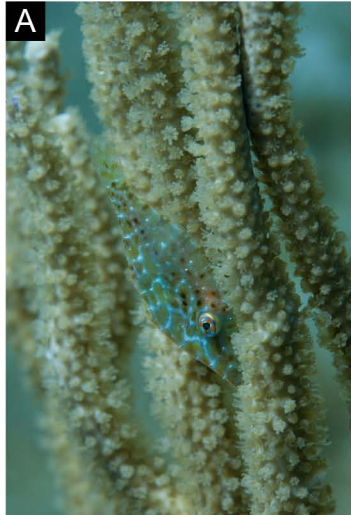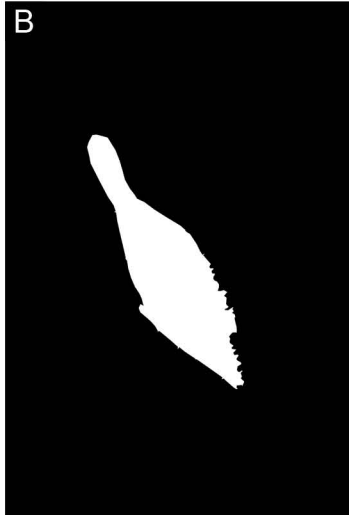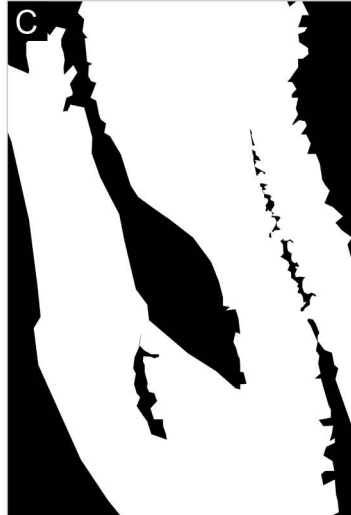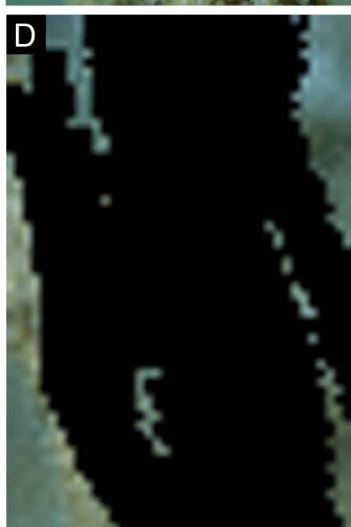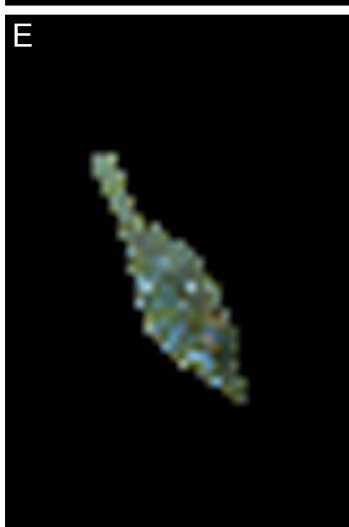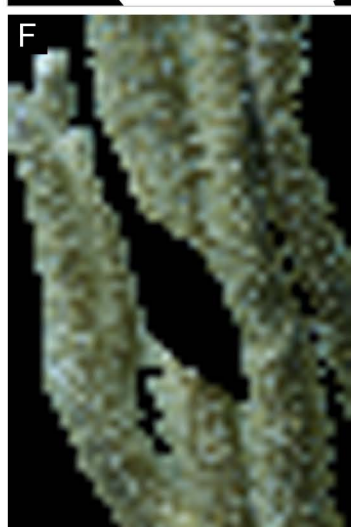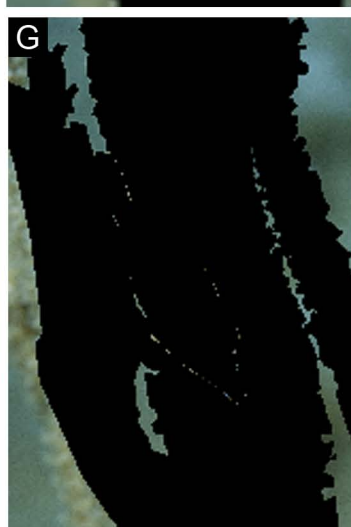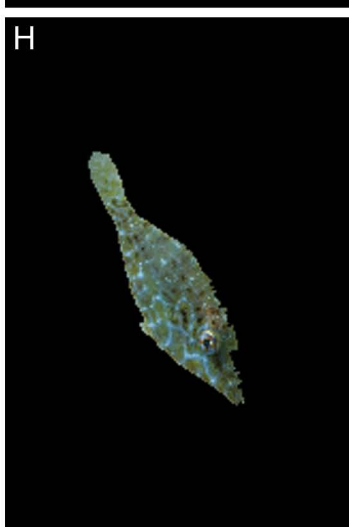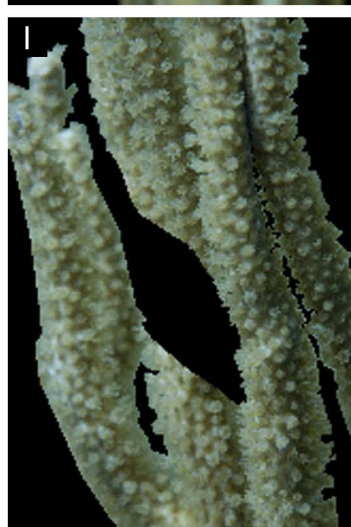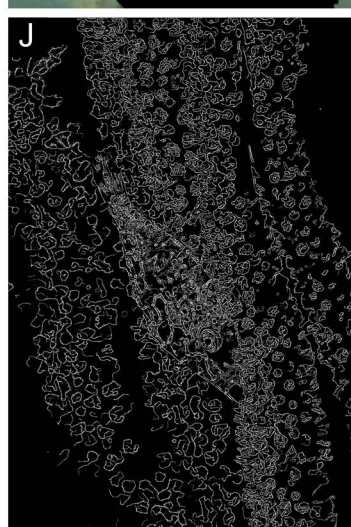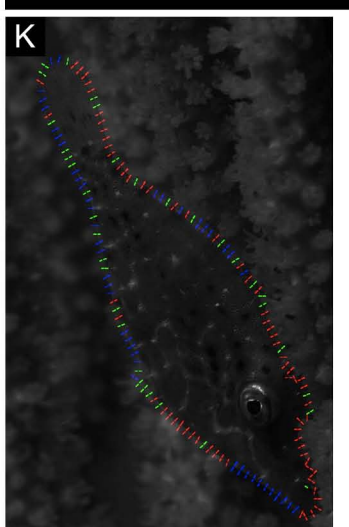

Supplement: NIHMS1732178-supplement-Allen_et_al__BJLS_2015_Supp__Fig__6.pdf [file NIHMS1732178-supplement-Allen_et_al__BJLS_2015_Supp__Fig__6.pdf]

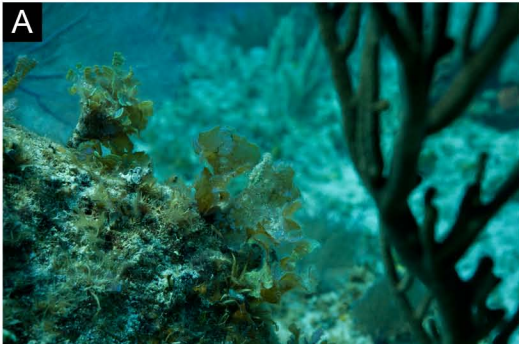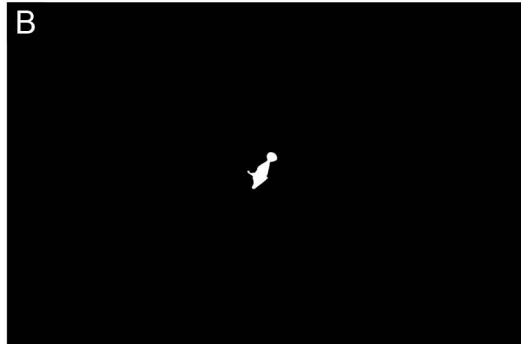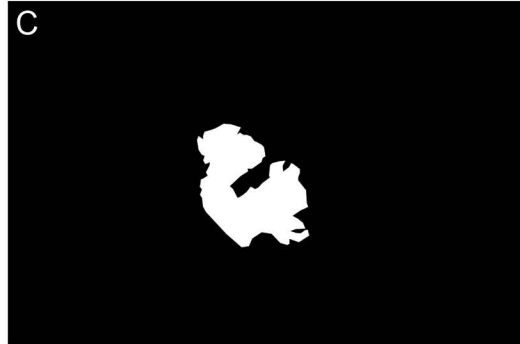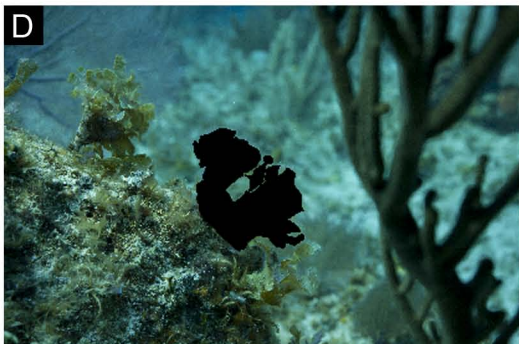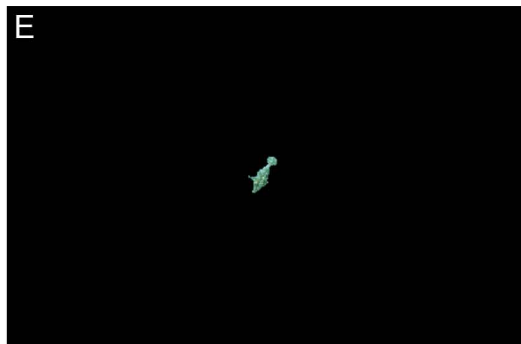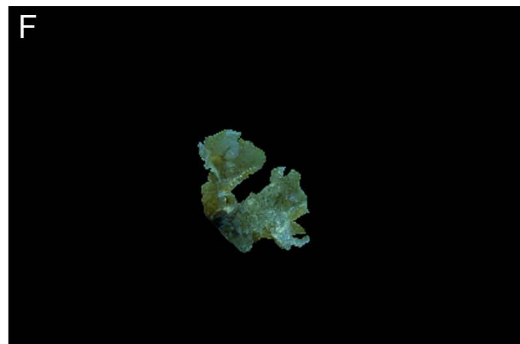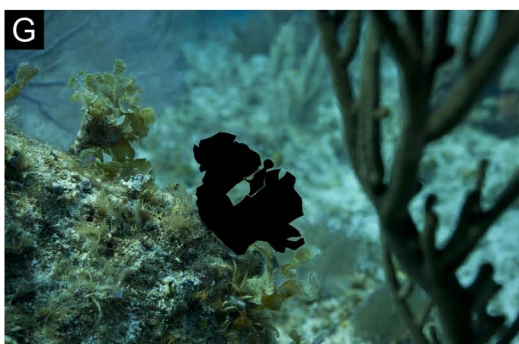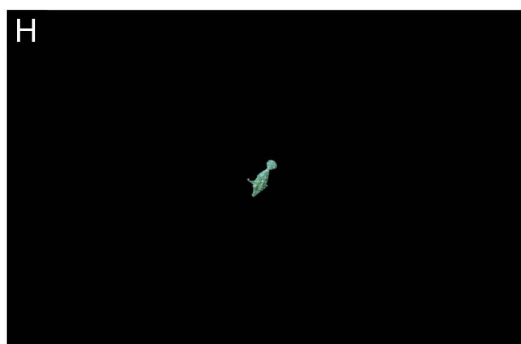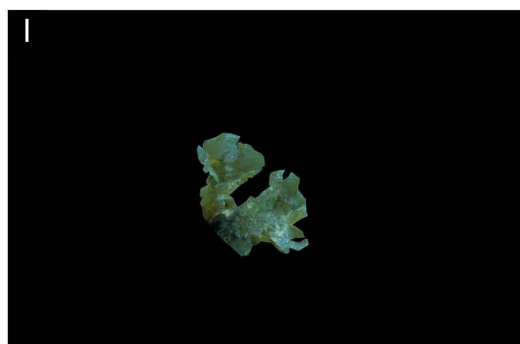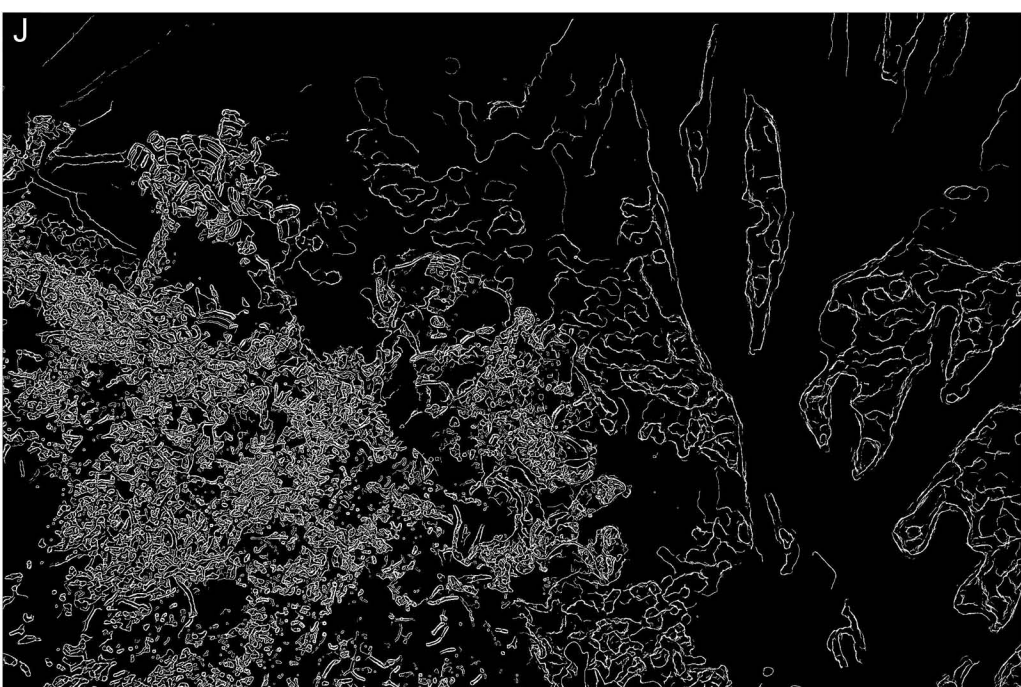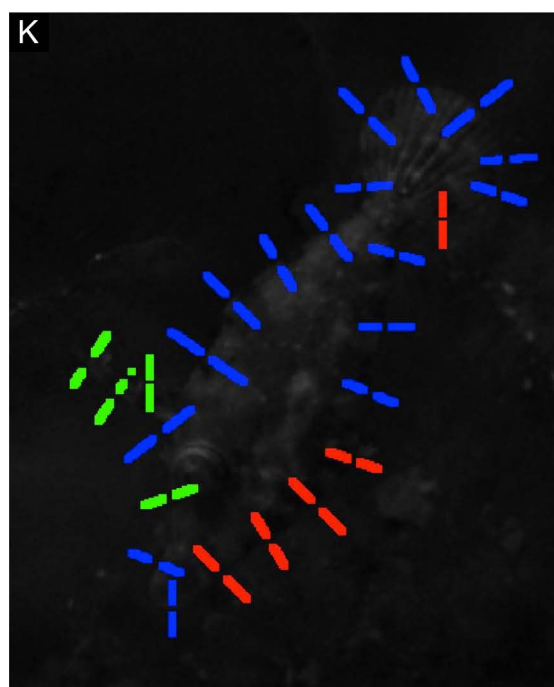

Supplement: NIHMS1732178-supplement-Allen_et_al__BJLS_2015_Supp__Fig__7.pdf [file NIHMS1732178-supplement-Allen_et_al__BJLS_2015_Supp__Fig__7.pdf]

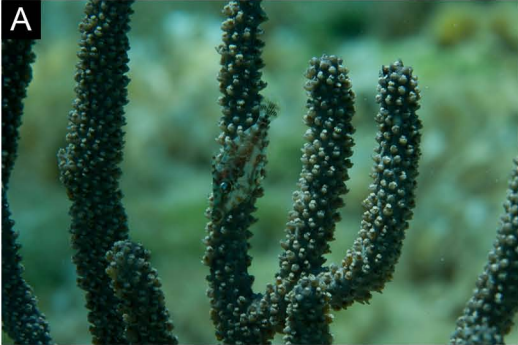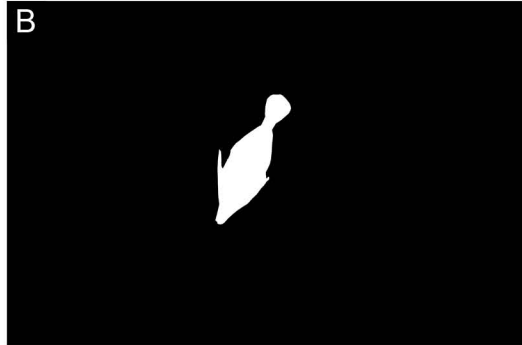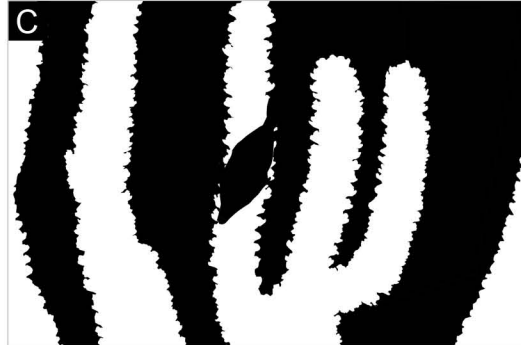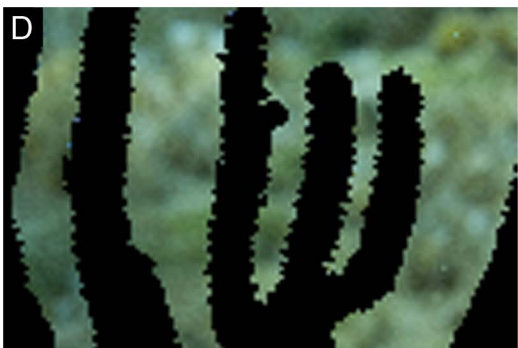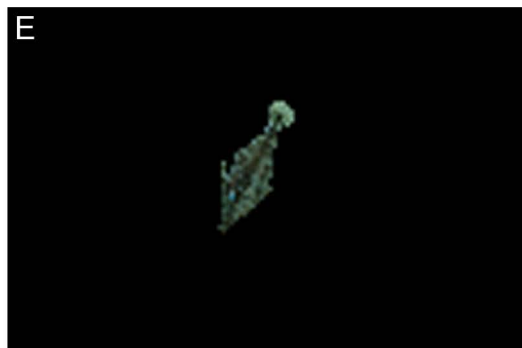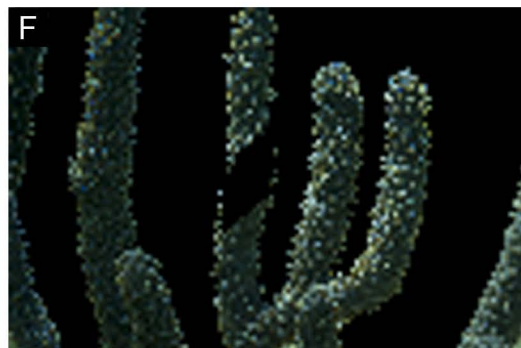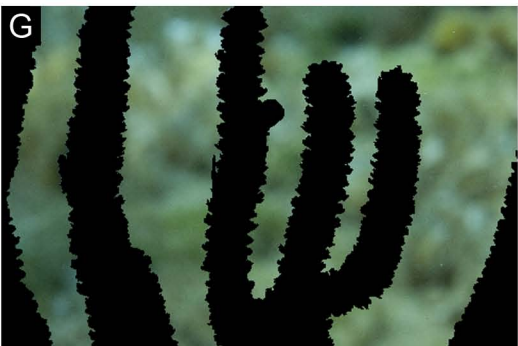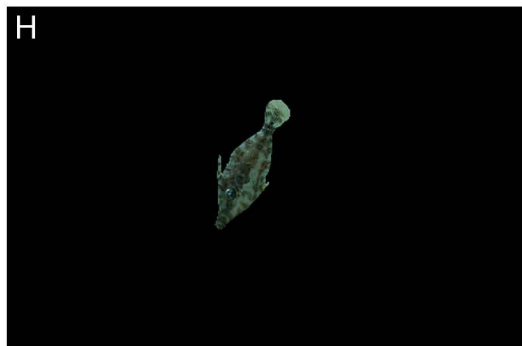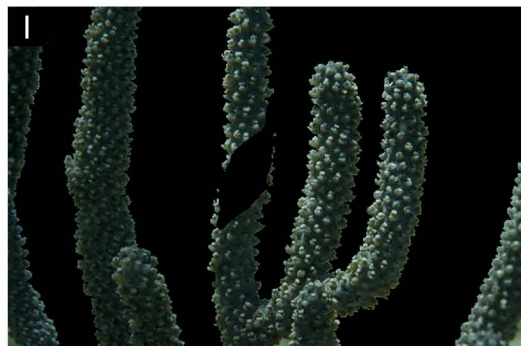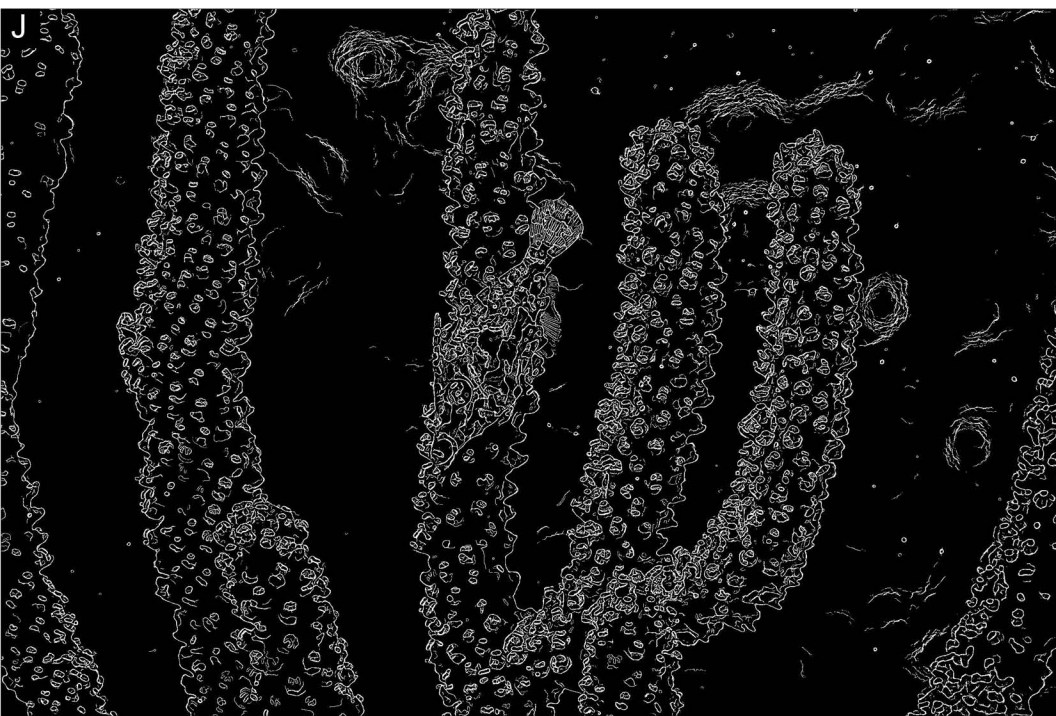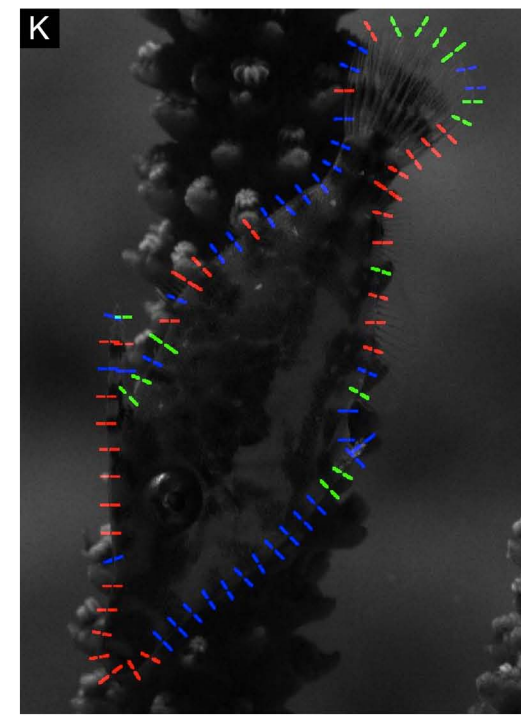

Supplement: NIHMS1732178-supplement-Allen_et_al__BJLS_2015_Supp__Fig__8.pdf [file NIHMS1732178-supplement-Allen_et_al__BJLS_2015_Supp__Fig__8.pdf]

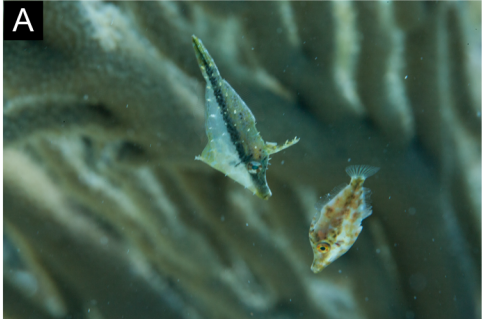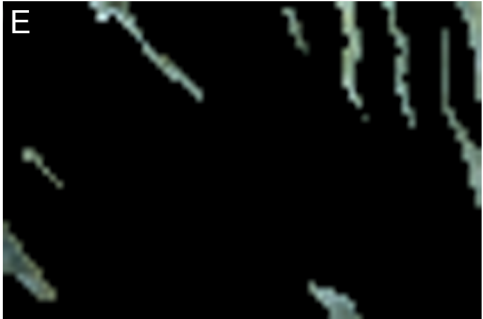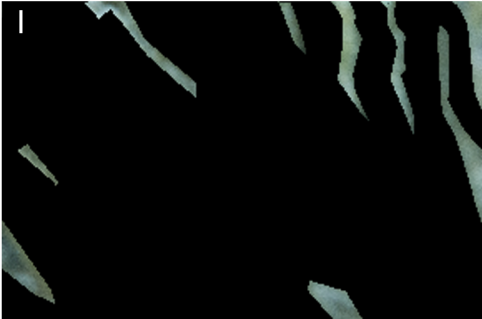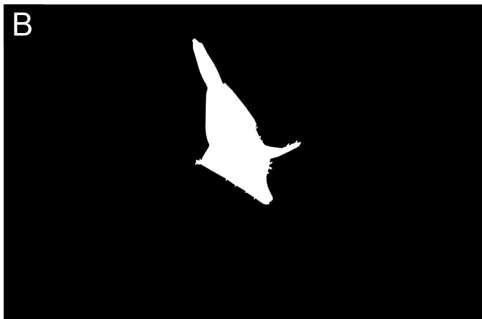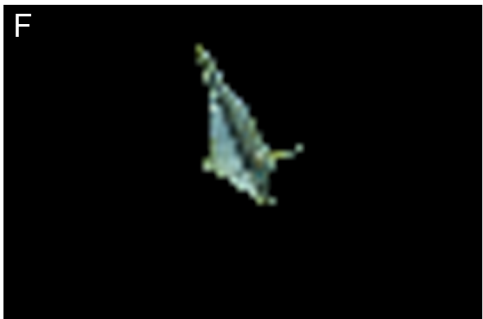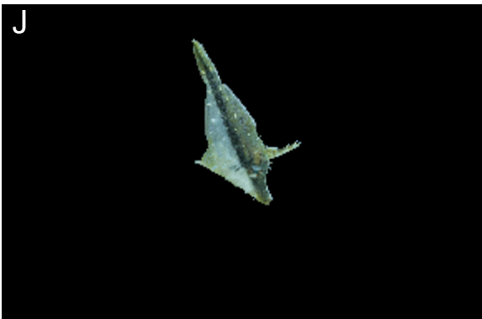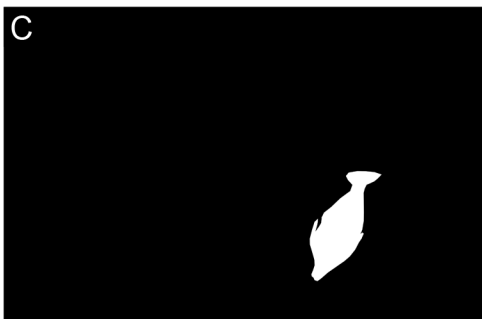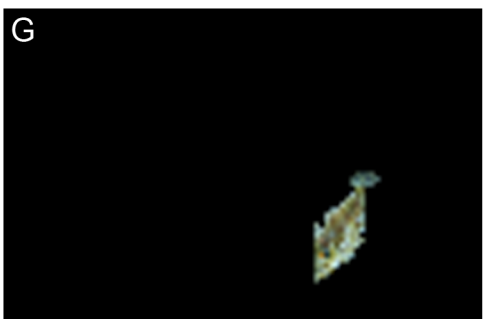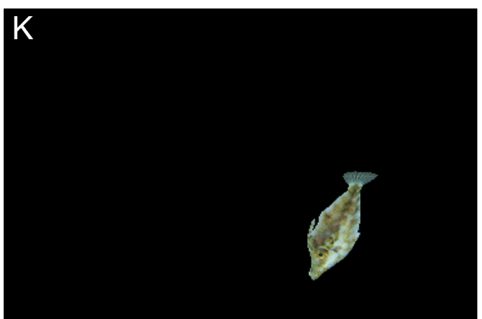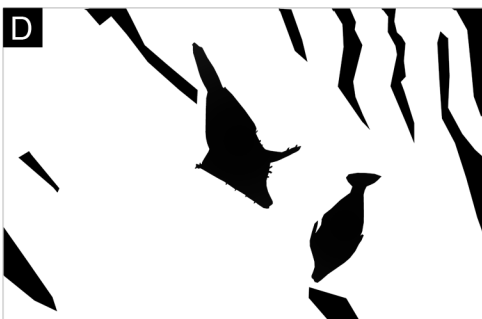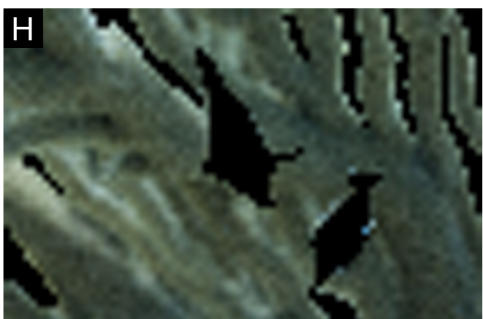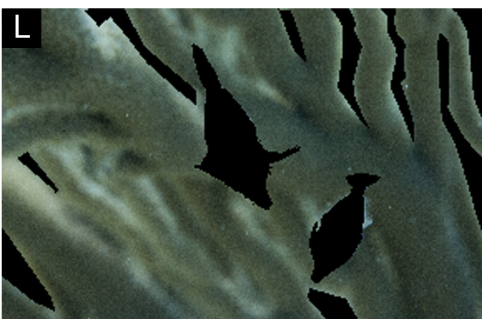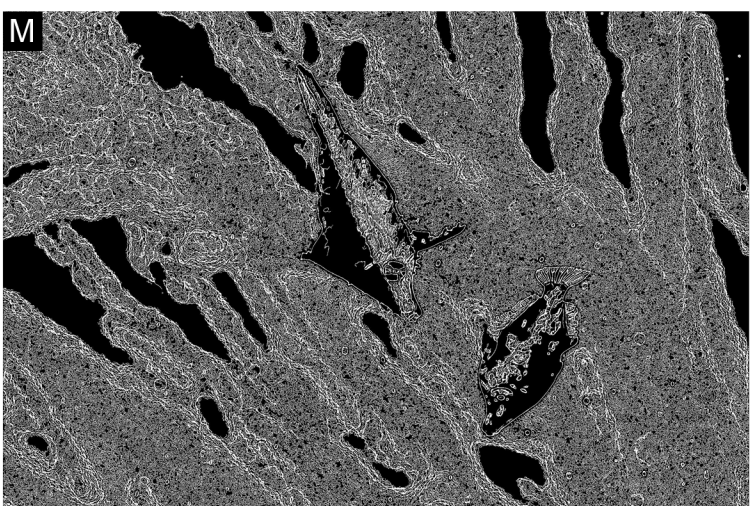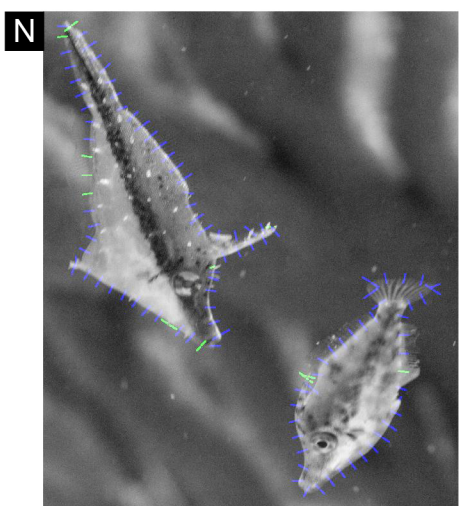

Supplement: NIHMS1732178-supplement-Allen_et_al__BJLS_2015_Supp__Fig__9.pdf [file NIHMS1732178-supplement-Allen_et_al__BJLS_2015_Supp__Fig__9.pdf]
